# Supplementary material
Source: PubMed Central journal article supplement (PMC5707188)

**A**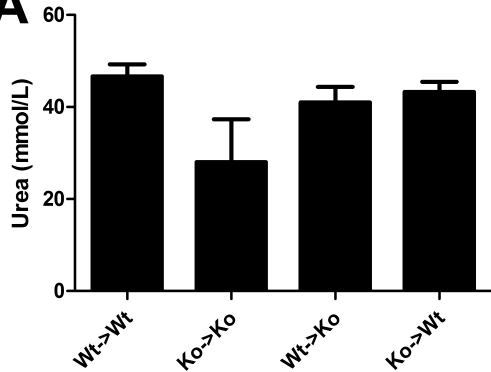**B**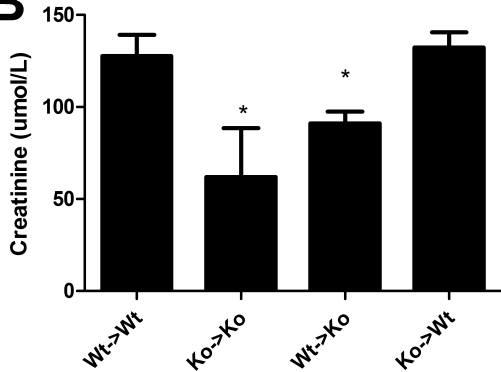

Supplement: mmc1.pdf [file mmc1.pdf]
